# Supplementary material for: From a genomic risk model to clinical trial implementation in a learning health system: the ProGRESS Study
Source: bioRxiv or medRxiv preprint supplement (doi:10.1101/2024.11.03.24316516), 2024-11-04
Supplement: Supplementary file [file media-1.pdf]

## **SUPPLEMENTAL FILES**

**Supplemental table 1: Description of Million Veteran Program (MVP) cohort**

**Supplemental table 2: Description of PRACTICAL consortium cohorts**

**Supplemental table 3: Association of family history with prostate cancer outcomes in MVP and PRACTICAL cohorts**

**Supplemental table 4: Coefficients in final P-CARE model**

**Supplemental table 5: Association of P-CARE model with prostate cancer outcomes in genetic ancestry strata in MVP**

**Supplemental table 6: Association of P-CARE model with prostate cancer outcomes in race- and ethnicity-stratified subgroups in MVP**

**Supplemental figure 1: Odds of prostate cancer in All of Us Research Program by P-CARE category**

**Supplemental file 1: Variants included in final PHS<sub>601</sub>**

**Supplemental file 2: Template of laboratory report package for ProGRESS clinical trial**

|                                     | <b>Cohort</b> |             |             |             |             |
|-------------------------------------|---------------|-------------|-------------|-------------|-------------|
|                                     | All           | African     | European    | American    | East Asian  |
| <b>Participants, number</b>         |               |             |             |             |             |
| All participants                    | 585,418       | 105,014     | 420,722     | 50,590      | 9,092       |
| Prostate cancer                     | 68,618        | 16,178      | 48,178      | 3775        | 487         |
| Metastases from prostate cancer     | 6606          | 1726        | 4467        | 369         | 44          |
| Death from prostate cancer          | 1709          | 364         | 1250        | 87          | 8           |
| <b>Age demographics, years</b>      |               |             |             |             |             |
| Age at enrollment, median (IQR)     | 65 (56, 71)   | 60 (52, 66) | 67 (59, 73) | 59 (45, 68) | 55 (40, 67) |
| Age at diagnosis, median (IQR)      | 67 (62, 72)   | 63 (58, 68) | 68 (63, 73) | 65 (60, 70) | 66 (61, 72) |
| Age at last follow-up, median (IQR) | 69 (60, 75)   | 64 (57, 71) | 71 (63, 76) | 63 (49, 71) | 59 (43, 70) |

**Supplemental Table 1: Description of Million Veteran Program (MVP) cohort.** Ages and distribution of continental population ancestry groups among MVP participants included in analyses. Abbreviations: IQR, interquartile range.

|                                                           | Cohort               |                      |                      |                      |
|-----------------------------------------------------------|----------------------|----------------------|----------------------|----------------------|
|                                                           | COSM                 | ProtecT              | African              | Asian                |
| <b>Participants, number</b>                               |                      |                      |                      |                      |
| Total                                                     | 3279                 | 6411                 | 6253                 | 2320                 |
| Controls                                                  | 1116                 | 4828                 | 3013                 | 1184                 |
| Prostate cancer cases                                     | 2163                 | 1583                 | 3240                 | 1194                 |
| Clinically significant prostate cancer cases <sup>a</sup> | 1403                 | 628                  | 1424                 | 716                  |
| Fatal prostate cancer cases                               | 278                  | -                    | -                    | -                    |
| <b>Participant demographic information</b>                |                      |                      |                      |                      |
| Age at diagnosis, median (IQR)                            | 70.0 (64.6, 76.5)    | 63.4 (59.0, 67.0)    | 62.8 (56.1, 68.1)    | 68.2 (62.0, 74.0)    |
| Age at last follow-up, median (IQR)                       | 78.1 (72.3, 84.1)    | 60 (55.7, 64.4)      | 63.0 (58, 72.1)      | 72.9 (66.5, 78.0)    |
| Positive family history, n                                | 355                  | 394                  | 999                  | 94                   |
| <b>P-CARE</b>                                             |                      |                      |                      |                      |
| P-CARE score, median (IQR)                                | 20.36 (19.90, 20.83) | 20.16 (19.74, 20.59) | 21.04 (20.64, 21.44) | 20.10 (19.69, 20.51) |

**Supplemental Table 2: Description of PRACTICAL consortium cohorts.** Participant characteristics of the four PRACTICAL Consortium case-control cohorts used in external validation of P-CARE. <sup>a</sup>Clinically significant prostate cancer defined as Gleason score  $\geq 7$ , PSA  $\geq 10$  ng/mL, T3-T4 stage, nodal metastases, or distant metastases. Abbreviations: CI, confidence interval; COSM, Cohort of Swedish Men; IQR, interquartile range; P-CARE, Prostate CA Risk and Evaluation; PRACTICAL, Prostate Cancer Association Group to Investigate Cancer Associated Alterations in the Genome; ProtecT, Prostate Testing for Cancer and Treatment; PSA, prostate-specific antigen.

| Clinical endpoint                             | HR (95% CI)        |
|-----------------------------------------------|--------------------|
|                                               | Univariable model  |
| <b>Any prostate cancer</b>                    |                    |
| MVP                                           | 1.77 (1.72 - 1.82) |
| COSM                                          | 1.90 (1.34 - 2.42) |
| ProtecT                                       | 1.21 (0.92 - 1.56) |
| African                                       | 2.50 (2.22 - 2.89) |
| Asian                                         | 1.87 (1.14 - 2.91) |
| <b>Clinically significant prostate cancer</b> |                    |
| COSM                                          | 1.74 (1.37 - 2.25) |
| ProtecT                                       | 1.14 (0.81 - 1.58) |
| African                                       | 2.83 (2.29 - 3.37) |
| Asian                                         | 1.46 (0.71 - 2.60) |
| <b>Metastatic prostate cancer</b>             |                    |
| MVP                                           | 1.42 (1.30 - 1.56) |
| <b>Fatal prostate cancer</b>                  |                    |
| MVP                                           | 1.56 (1.26 - 1.86) |
| COSM                                          | 1.62 (0.92 - 2.55) |

**Supplemental Table 3: Association of family history with prostate cancer outcomes in MVP and PRACTICAL cohorts.** Data are HR (95% CI) for prostate cancer outcomes associated with reporting at least one first-degree family member with prostate cancer. Abbreviations: CI, confidence interval; COSM, Cohort of Swedish Men; HR, hazard ratio; MVP, Million Veteran Program; PRACTICAL, Prostate Cancer Association Group to Investigate Cancer Associated Alterations in the Genome; ProtecT, Prostate Testing for Cancer and Treatment.

| Predictor          | Coefficient (95% CI)         |
|--------------------|------------------------------|
| PHS <sub>601</sub> | 1.09746 (1.0856 - 1.1106)    |
| Family history     | 0.48881 (0.4640 - 0.5100)    |
| PC1                | -0.00277 (-0.0053 - -0.0005) |
| PC2                | 0.00069 (-0.0035 - 0.0045)   |

**Supplemental Table 4: Coefficients in final P-CARE model.** Estimates of coefficients from LASSO-trained PHS using age at diagnosis of prostate cancer as time to event and PHS<sub>601</sub>, family history, and the first 2 principal components of genetic ancestry as predictors. Abbreviations: CI, confidence interval; PHS, polygenic hazard score; PC, principal component.

| Clinical endpoint                 | N       | HR (95% CI)              |                           |                            |                          |                           |
|-----------------------------------|---------|--------------------------|---------------------------|----------------------------|--------------------------|---------------------------|
|                                   |         | HR <sub>SD</sub>         | HR <sub>80/20</sub>       | HR <sub>20/50</sub>        | HR <sub>80/5</sub>       | HR <sub>95/5</sub>        |
| <b>Any prostate cancer</b>        |         |                          |                           |                            |                          |                           |
| All                               | 585,418 | 2.04 (1.99 - 2.08)       | 6.33 (5.95 - 6.71)        | 0.43 (0.42 - 0.45)         | 2.75 (2.66 - 2.84)       | 4.09 (3.89 - 4.29)        |
| African                           | 105,014 | 1.95 (1.85 - 2.05)       | 5.83 (5.02 - 6.80)        | 0.49 (0.45 - 0.52)         | 2.82 (2.60 - 3.06)       | 3.75 (3.36 - 4.19)        |
| European                          | 420,722 | 2.05 (1.98 - 2.12)       | 5.77 (5.32 - 6.22)        | 0.43 (0.42 - 0.45)         | 2.49 (2.38 - 2.58)       | 3.81 (3.58 - 4.02)        |
| American                          | 50,590  | 2.04 (1.86 - 2.26)       | 5.56 (4.37 - 7.05)        | 0.44 (0.39 - 0.49)         | 2.45 (2.16 - 2.79)       | 3.73 (3.12 - 4.45)        |
| East Asian                        | 9,092   | 2.11 (1.55 - 2.85)       | 5.81 (2.75 - 11.07)       | 0.45 (0.31 - 0.61)         | 2.42 (1.67 - 3.45)       | 3.88 (2.21 - 6.56)        |
| <b>Metastatic prostate cancer</b> |         |                          |                           |                            |                          |                           |
| All                               | 585,418 | 2.05 (1.93 - 2.16)       | 6.50 (5.50 - 7.38)        | 0.43 (0.40 - 0.46)         | 2.78 (2.54 - 2.99)       | 4.17 (3.68 - 4.59)        |
| African                           | 105,014 | 1.89 (1.65 - 2.19)       | 5.41 (3.72 - 7.64)        | 0.51 (0.44 - 0.58)         | 2.69 (2.17 - 3.38)       | 3.54 (2.70 - 4.75)        |
| European                          | 420,722 | 1.94 (1.78 - 2.14)       | 5.07 (4.07 - 6.43)        | 0.46 (0.41 - 0.51)         | 2.32 (2.07 - 2.63)       | 3.45 (2.91 - 4.12)        |
| American                          | 50,590  | 2.05 (1.41 - 2.61)       | 5.83 (2.29 - 10.13)       | 0.45 (0.33 - 0.68)         | 2.48 (1.54 - 3.35)       | 3.83 (1.88 - 5.94)        |
| East Asian                        | 9,092   | 3.13 (0.58 - 8.53)       | 61.89 (0.30 - 143.86)     | 0.53 (0.09 - 1.82)         | 4.27 (0.54 - 12.89)      | 17.94 (0.38 - 50.76)      |
| <b>Fatal prostate cancer</b>      |         |                          |                           |                            |                          |                           |
| All                               | 585,418 | 1.95 (1.76 - 2.15)       | 5.71 (4.33 - 7.30)        | 0.45 (0.41 - 0.52)         | 2.59 (2.22 - 2.97)       | 3.77 (3.05 - 4.57)        |
| African                           | 105,014 | 1.62 (1.16 - 2.12)       | 3.78 (1.47 - 7.06)        | 0.61 (0.45 - 0.86)         | 2.15 (1.25 - 3.19)       | 2.67 (1.33 - 4.41)        |
| European                          | 420,722 | 1.91 (1.63 - 2.18)       | 4.93 (3.28 - 6.68)        | 0.47 (0.40 - 0.57)         | 2.28 (1.85 - 2.68)       | 3.37 (2.47 - 4.26)        |
| American                          | 50,590  | 2.16 (0.95 - 3.91)       | 7.70 (0.89 - 26.12)       | 0.49 (0.21 - 1.06)         | 2.67 (0.94 - 5.51)       | 4.51 (0.91 - 12.09)       |
| East Asian                        | 9,092   | 8.91E60 (0.93 - 9.39E40) | 1.67E142 (0.85 - 1.91E95) | 1.46E113 (2.62E-37 - 1.09) | 1.73E75 (0.92 - 3.96E49) | 7.19E112 (0.88 - 7.36E75) |

**Supplemental Table 5: Association of P-CARE model with prostate cancer outcomes in genetic ancestry strata in MVP.**

Association of P-CARE quantiles with any, metastatic, and fatal prostate cancer in genetic ancestry subgroups within MVP.

Abbreviations: CI, confidence interval; HR, hazard ratio; MVP, Million Veteran Program; P-CARE, Prostate Cancer Risk and Evaluation.

| Clinical endpoint                   | N       | HR (95% CI)                |                        |                           |                            |
|-------------------------------------|---------|----------------------------|------------------------|---------------------------|----------------------------|
|                                     |         | HR <sub>80/20</sub>        | HR <sub>20/50</sub>    | HR <sub>80/50</sub>       | HR <sub>95/50</sub>        |
| <b>Any prostate cancer</b>          |         |                            |                        |                           |                            |
| All                                 | 585,418 | 6.33 (5.95 - 6.71)         | 0.43 (0.42 - 0.45)     | 2.75 (2.66 - 2.84)        | 4.09 (3.89 - 4.29)         |
| American Indian or Alaska Native    | 5507    | 5.99 (2.92 - 10.71)        | 0.45 (0.34 - 0.61)     | 2.56 (1.75 - 3.66)        | 3.91 (2.27 - 6.17)         |
| Asian                               | 6210    | 8.03 (2.71 - 20.08)        | 0.40 (0.23 - 0.61)     | 2.80 (1.66 - 4.63)        | 4.88 (2.16 - 9.64)         |
| Black or African American           | 101,920 | 5.83 (5.05 - 6.83)         | 0.48 (0.44 - 0.52)     | 2.80 (2.58 - 3.04)        | 3.72 (3.33 - 4.17)         |
| Hispanic White                      | 26,037  | 5.07 (3.36 - 7.27)         | 0.47 (0.39 - 0.56)     | 2.32 (1.88 - 2.81)        | 3.47 (2.59 - 4.57)         |
| Native Hawaiian or Pacific Islander | 3042    | 6.94 (1.42 - 16.58)        | 0.47 (0.26 - 0.85)     | 2.69 (1.20 - 4.55)        | 4.35 (1.30 - 9.01)         |
| Non-Hispanic White                  | 418,387 | 5.78 (5.32 - 6.18)         | 0.43 (0.41 - 0.45)     | 2.49 (2.38 - 2.58)        | 3.81 (3.58 - 4.02)         |
| Other                               | 8077    | 7.58 (4.34 - 15.33)        | 0.41 (0.29 - 0.52)     | 2.97 (2.25 - 4.42)        | 4.73 (3.17 - 8.03)         |
| Unknown                             | 16,238  | 6.66 (4.20 - 9.56)         | 0.43 (0.36 - 0.52)     | 2.79 (2.16 - 3.47)        | 4.28 (2.98 - 5.69)         |
| <b>Metastatic prostate cancer</b>   |         |                            |                        |                           |                            |
| All                                 | 585,418 | 6.50 (5.50 - 7.38)         | 0.43 (0.40 - 0.46)     | 2.78 (2.54 - 2.99)        | 4.17 (3.68 - 4.59)         |
| American Indian or Alaska Native    | 5507    | 1.93E71 (0.15 - 390.02)    | 0.55 (0.06 - 2.47)     | 9.45E36 (0.36 - 23.33)    | 5.31E53 (0.24 - 87.63)     |
| Asian                               | 6210    | ∞ (0.17 - 872.47)          | 0.79 (0.04 - 2.62)     | 4.51E176 (0.39 - 31.10)   | 1.38E255 (0.25 - 198.21)   |
| Black or African American           | 101,920 | 5.52 ((3.71 - 8.29)        | 0.50 (0.42 - 0.58)     | 2.70 (2.16 - 3.47)        | 3.56 (2.66 - 4.91)         |
| Hispanic White                      | 26,037  | 3.93 (1.12 - 8.24)         | 0.57 (0.36 - 0.95)     | 1.98 (1.06 - 3.01)        | 2.79 (1.09 - 5.05)         |
| Native Hawaiian or Pacific Islander | 3042    | 1.02E108 (0.08 - 9.70E48)  | 0.76 (1.05E-19 - 3.37) | 2.43E55 (0.26 - 1.13E26)  | 2.87E81 (0.13 - 9.44E37)   |
| Non-Hispanic White                  | 418,387 | 5.16 (4.15 - 6.57)         | 0.46 (0.41 - 0.50)     | 2.34 (2.09 - 2.66)        | 3.49 (2.96 - 4.18)         |
| Other                               | 8077    | 18.10 (0.62 - 95.88)       | 0.51 (0.12 - 1.24)     | 3.78 (0.77 - 11.28)       | 7.99 (0.69 - 30.46)        |
| Unknown                             | 16,238  | 6.94 (1.89 - 16.69)        | 0.47 (0.28 - 0.74)     | 2.74 (1.41 - 4.53)        | 4.30 (1.63 - 8.51)         |
| <b>Fatal prostate cancer</b>        |         |                            |                        |                           |                            |
| All                                 | 585,418 | 5.71 (4.33 - 7.30)         | 0.45 (0.41 - 0.52)     | 2.59 (2.22 - 2.97)        | 3.77 (3.05 - 4.57)         |
| American Indian or Alaska Native    | 5507    | 1.95E45 (0.15 - 1.85E40)   | 0.74 (4.45E-7 - 5.30)  | 1.55E24 (0.29 - 3.52E21)  | 1.01E37 (0.20 - 2.32E30)   |
| Asian                               | 6210    | 3.93E305 (1.00 - 1.56E180) | 0.28 (2.72E-69 - 1.00) | 6.12E156 (1.00 - 1.54E94) | 9.67E216 (1.00 - 1.36E140) |
| Black or African American           | 101,920 | 3.88 (1.35 - 7.47)         | 0.61 (0.44 - 0.88)     | 2.16 (1.19 - 3.30)        | 2.70 (1.25 - 4.58)         |
| Hispanic White                      | 26,037  | 9.11 (0.34 - 44.08)        | 0.57 (0.17 - 1.67)     | 2.64 (0.57 - 7.09)        | 4.75 (0.44 - 17.74)        |
| Native Hawaiian or Pacific Islander | 3042    | 1.84E92 (0.05 - 1.10E93)   | 1.05 (2.32E-16 - 4.17) | 1.99E45 (0.20 - 1.18E46)  | 1.38E69 (0.09 - 8.24E69)   |
| Non-Hispanic White                  | 418,387 | 5.02 (3.39 - 6.89)         | 0.48 (0.40 - 0.57)     | 2.31 (1.89 - 2.73)        | 3.41 (2.53 - 4.36)         |
| Other                               | 8077    | 5.86E126 (0.01 - 1.88E50)  | 1.03 (7.48E-4 - 6.95)  | 2.31E67 (0.10 - 1.16E27)  | 2.90E97 (0.04 - 2.30E40)   |
| Unknown                             | 16,238  | ∞ (0.32 - 83.89)           | 0.63 (0.14 - 1.67)     | 3.62E199 (0.54 - 11.32)   | 2.97E285 (0.42 - 28.18)    |

**Supplemental Table 6:** Association of P-CARE quantiles with any, metastatic, and fatal prostate cancer in self-reported race and ethnicity subgroups within MVP. Abbreviations: CI, confidence interval; HR, hazard ratio; MVP, Million Veteran Program; P-CARE, Prostate Cancer Risk and Evaluation.

# All Ancestries (n=74,331)

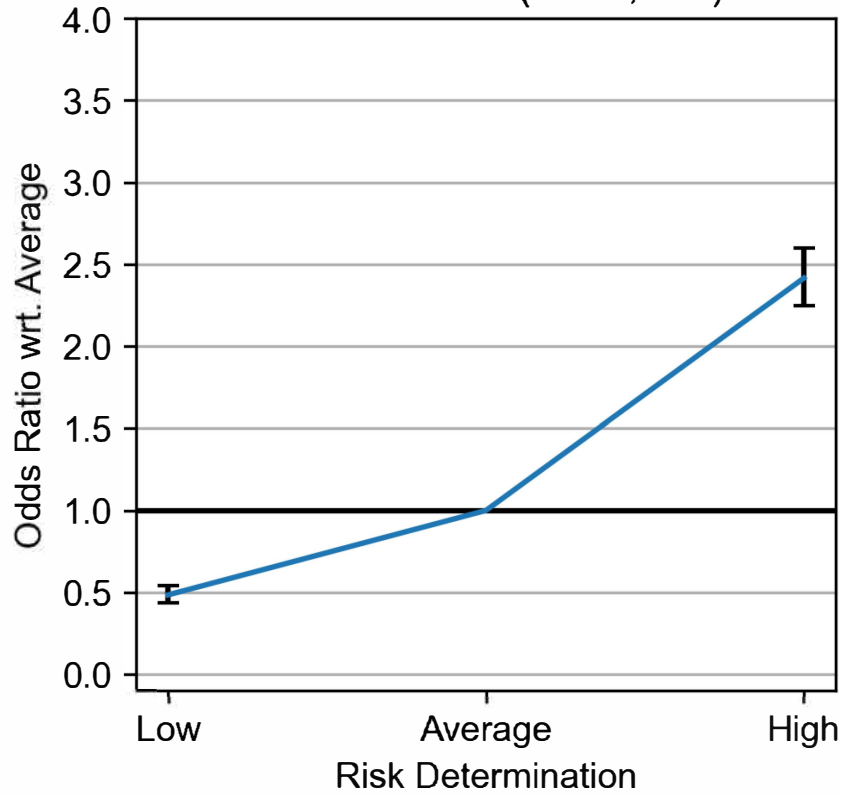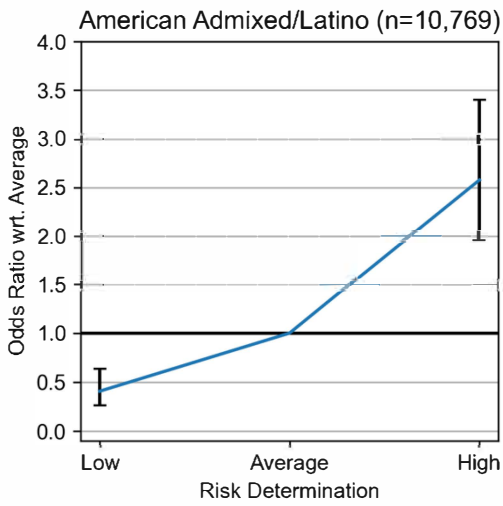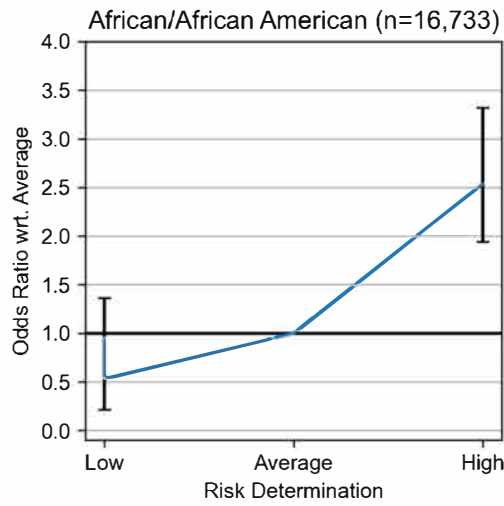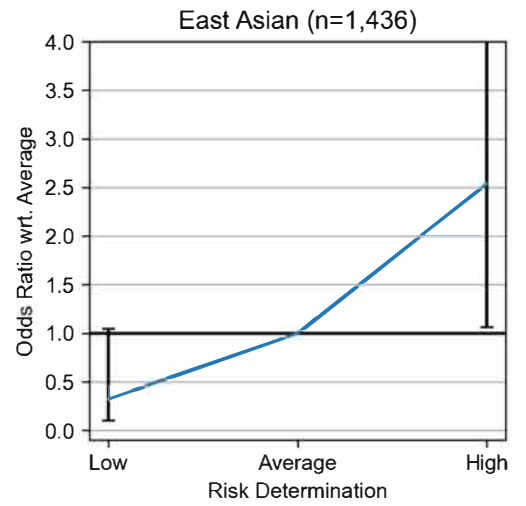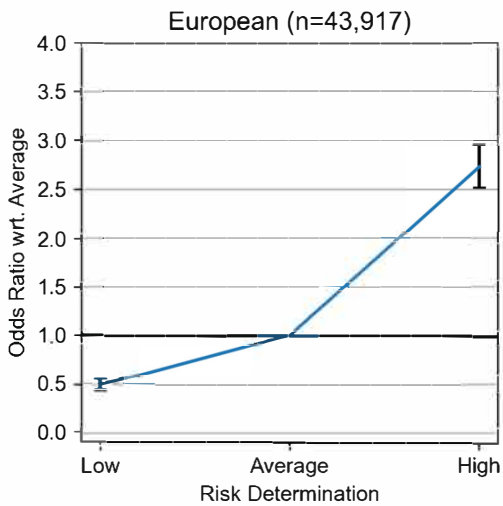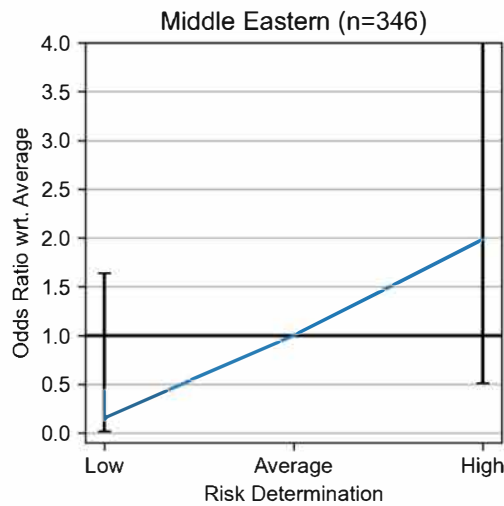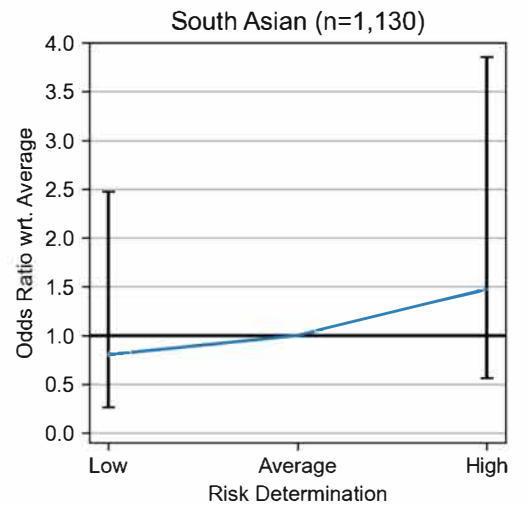



**Supplemental Figure 1: Odds of prostate cancer in All of Us Research Program by P-CARE category.** Shown are the odds ratios for an individual to be diagnosed with prostate cancer in the low and high P-CARE categories, relative to the average P-CARE category, derived from logistic regression models controlling for age. Error bars correspond to the 95% confidence intervals, and the shown ancestries are the predictions provided by All of Us. Abbreviations: P-CARE, Prostate CAncer Risk and Evaluation.
